# Supplementary material for: High metabolic zinc demand within native Amundsen and Ross sea phytoplankton communities determined by stable isotope uptake rate measurements
Source: Copernicus journal article supplement (doi:10.5194/bg-21-5685-2024), 2024-12-19
Supplement: Supplementary file 1 [file bg-21-5685-2024-supplement.zip]

## Sheet: Sheet1
Summary of pMetal technical duplicate measurements
Replicate	67Zn pM		Spl	Av pM Zn Sample	Range pM Zn			Replicate	110Cd pM		Spl	Av pM Cd Sample	Range pM Cd
STN4 Zn[5] B	5.97545		STN4Zn[5]	5.46738	1.01615			STN4 Cd[5] B	0.375953		STN4Cd[5]	0.380593	0.00928116
STN4 Zn[5] A	4.9593		STN4Zn[4]	5.47661	0.978431			STN4 Cd[5] A	0.385234		STN4Cd[4]	0.327694	0.0216894
STN4 Zn[4] B	4.9874		STN4Zn[3]	18.855	0.26865			STN4 Cd[4] B	0.316849		STN4Cd[3]	2.73064	0.0221533
STN4 Zn[4] A	5.96583		STN4Zn[2]	22.0492	0.26244			STN4 Cd[4] A	0.338539		STN4Cd[2]	3.82181	0.122566
STN4 Zn[3] B	18.7207		STN4Zn[1]	35.4302	1.81815			STN4 Cd[3] B	2.71956		STN4Cd[1]	7.19785	0.0152274
STN4 Zn[3] A	18.9893		STN11Zn[9]	2.92138	0.223039			STN4 Cd[3] A	2.74172		STN11Cd[9]	1.43336	0.105272
STN4 Zn[2] B	21.9179		STN11Zn[8]	11.8165	2.79898			STN4 Cd[2] B	3.76052		STN11Cd[8]	0.652577	0.0147366
STN4 Zn[2] A	22.1804		STN11Zn[7]	13.1785	0.132743			STN4 Cd[2] A	3.88309		STN11Cd[7]	0.336088	0.0421177
STN4 Zn[1] B	34.5211		STN11Zn[6]	10.3337	1.13072			STN4 Cd[1] B	7.20546		STN11Cd[6]	1.02352	0.0227497
STN4 Zn[1] A	36.3392		STN11Zn[5]	22.8324	1.48214			STN4 Cd[1] A	7.19023		STN11Cd[5]	1.96817	0.0199389
STN11 Zn[9] B	3.0329		STN11Zn[4]	48.8106	0.0894213			STN11 Cd[9] B	1.48599		STN11Cd[4]	4.96698	0.155435
STN11 Zn[9] A	2.80986		STN11Zn[3]	151.201	2.82529			STN11 Cd[9] A	1.38072		STN11Cd[3]	31.7133	0.96111
STN11 Zn[8] B	10.417		STN11Zn[2]	233.174	7.32212			STN11 Cd[8] B	0.645209		STN11Cd[2]	51.1537	0.0250991
STN11 Zn[8] A	13.216		STN11Zn[1]	257.918	1.14778			STN11 Cd[8] A	0.659946		STN11Cd[1]	62.2112	1.00031
STN11 Zn[7] B	13.2449		STN15Zn[7]	21.6631	0.218479			STN11 Cd[7] B	0.357147		STN15Cd[7]	0.521212	0.00339891
STN11 Zn[7] A	13.1122		STN15Zn[6]	15.6425	1.86355			STN11 Cd[7] A	0.315029		STN15Cd[6]	1.59796	0.129776
STN11 Zn[6] B	9.76829		STN15Zn[5]	9.95807	0.608984			STN11 Cd[6] B	1.0349		STN15Cd[5]	0.448951	0.0118468
STN11 Zn[6] A	10.899		STN15Zn[4]	21.621	0.344447			STN11 Cd[6] A	1.01215		STN15Cd[4]	0.868763	0.00728935
STN11 Zn[5] B	22.0913		STN15Zn[3]	21.5052	0.541029			STN11 Cd[5] B	1.9582		STN15Cd[3]	3.98426	0.0258295
STN11 Zn[5] A	23.5734		STN15Zn[2]	48.846	0.409528			STN11 Cd[5] A	1.97814		STN15Cd[2]	12.6251	0.068164
STN11 Zn[4] B	48.8553		STN15Zn[1]	153.657	1.03919			STN11 Cd[4] B	4.88926		STN15Cd[1]	20.8947	0.247879
STN11 Zn[4] A	48.7659		STN20Zn[6]	5.62877	0.107526			STN11 Cd[4] A	5.0447		STN20Cd[6]	1.2402	0.00683003
STN11 Zn[3] B	149.789		STN20Zn[5]	9.77876	0.0695212			STN11 Cd[3] B	31.2328		STN20Cd[5]	1.25414	0.025929
STN11 Zn[3] A	152.614		STN20Zn[4]	20.6638	0.0254158			STN11 Cd[3] A	32.1939		STN20Cd[4]	1.73017	0.10698
STN11 Zn[2] B	229.513		STN20Zn[3]	19.6875	1.02873			STN11 Cd[2] B	51.1662		STN20Cd[3]	3.27527	0.0874711
STN11 Zn[2] A	236.835		STN20Zn[2]	17.8926	0.454861			STN11 Cd[2] A	51.1411		STN20Cd[2]	2.25407	0.0756413
STN11 Zn[1] B	257.344		STN22Zn[6]	4.49188	1.03887			STN11 Cd[1] B	61.711		STN20Cd[1]	3.2433	0.0383234
STN11 Zn[1] A	258.492		STN22Zn[5]	6.96769	0.795925			STN11 Cd[1] A	62.7113		STN22Cd[6]	0.506569	0.0533436
STN15 Zn[7] B	21.5539		STN22Zn[4]	15.6032	1.65707			STN15 Cd[7] B	0.522911		STN22Cd[5]	1.03275	0.000418959
STN15 Zn[7] A	21.7723		STN22Zn[3]	58.145	2.24685			STN15 Cd[7] A	0.519512		STN22Cd[4]	1.54903	0.0455052
STN15 Zn[6] B	14.7107		STN22Zn[2]	146.768	1.11978			STN15 Cd[6] B	1.66285		STN22Cd[3]	9.71025	0.0510388
STN15 Zn[6] A	16.5743		STN22Zn[1]	415.259	7.18942			STN15 Cd[6] A	1.53307		STN22Cd[2]	35.3616	0.639873
STN15 Zn[5] B	10.2626		STN29Zn[6]	15.5055	2.00138			STN15 Cd[5] B	0.454874		STN22Cd[1]	53.2556	0.0944612
STN15 Zn[5] A	9.65358		STN29Zn[5]	33.8861	0.235951			STN15 Cd[5] A	0.443027		STN29Cd[6]	1.27735	0.0845022
STN15 Zn[4] B	21.7932		STN29Zn[4]	11.9235	0.100437			STN15 Cd[4] B	0.872408		STN29Cd[5]	2.56291	0.00376481
STN15 Zn[4] A	21.4488		STN29Zn[3]	21.4806	1.03874			STN15 Cd[4] A	0.865119		STN29Cd[4]	1.50303	0.0418538
STN15 Zn[3] B	21.7757		STN29Zn[2]	46.2786	1.86778			STN15 Cd[3] B	3.97134		STN29Cd[3]	3.50112	0.0492764
STN15 Zn[3] A	21.2347		STN29Zn[1]	84.1516	2.64003			STN15 Cd[3] A	3.99717		STN29Cd[2]	34.5632	0.612303
STN15 Zn[2] B	48.6412		STN32Zn[8]	24.669	0.751081			STN15 Cd[2] B	12.6592		STN29Cd[1]	31.2028	0.325684
STN15 Zn[2] A	49.0508		STN32Zn[7]	29.0955	0.426686			STN15 Cd[2] A	12.591		STN32Cd[8]	0.567096	0.0321786
STN15 Zn[1] B	154.177		STN32Zn[6]	24.4614	2.45922			STN15 Cd[1] B	20.7707		STN32Cd[7]	0.693417	0.0863471
STN15 Zn[1] A	153.138		STN32Zn[5]	38.163	1.98976			STN15 Cd[1] A	21.0186		STN32Cd[6]	7.62185	0.0760327
STN20 Zn[6] B	5.57501		STN32Zn[4]	54.0469	0.866158			STN20 Cd[6] B	1.24361		STN32Cd[5]	5.14943	0.00491268
STN20 Zn[6] A	5.68253		STN32Zn[3]	64.5695	2.73823			STN20 Cd[6] A	1.23678		STN32Cd[4]	8.58402	0.518617
STN20 Zn[5] B	9.81352		STN32Zn[2]	343.686	9.50893			STN20 Cd[5] B	1.24117		STN32Cd[3]	6.98336	0.0442606
STN20 Zn[5] A	9.744		STN32Zn[1]	446.153	0.148773			STN20 Cd[5] A	1.2671		STN32Cd[2]	123.257	0.847128
STN20 Zn[4] B	20.6511		STN35Zn[4]	87.6625	0.272198			STN20 Cd[4] B	1.67668		STN32Cd[1]	82.0001	1.37115
STN20 Zn[4] A	20.6765		STN35Zn[3]	172.78	0.909711			STN20 Cd[4] A	1.78366		STN35Cd[4]	3.32678	0.456213
STN20 Zn[3] B	19.1732		STN35Zn[2]	190.942	1.39255			STN20 Cd[3] B	3.23154		STN35Cd[3]	22.02	0.284477
STN20 Zn[3] A	20.2019		STN35Zn[1]	181.798	3.6853			STN20 Cd[3] A	3.31901		STN35Cd[2]	69.8832	1.48043
STN20 Zn[2] B	17.6652		STN41Zn[8]	17.8532	0.00639992			STN20 Cd[2] B	2.29189		STN35Cd[1]	64.9498	0.401608
STN20 Zn[2] A	18.12		STN41Zn[7]	6.92432	0.0338883			STN20 Cd[2] A	2.21625		STN41Cd[8]	0.31715	0.000442798
STN22 Zn[6] B	3.97245		STN41Zn[6]	15.309	0.0274066			STN20 Cd[1] B	3.26246		STN41Cd[7]	0.195056	0.0191209
STN22 Zn[6] A	5.01132		STN41Zn[5]	19.0175	1.04195			STN20 Cd[1] A	3.22414		STN41Cd[6]	1.02434	0.000832403
STN22 Zn[5] B	6.56973		STN41Zn[4]	52.3525	1.06819			STN22 Cd[6] B	0.479897		STN41Cd[5]	0.857189	0.0352028
STN22 Zn[5] A	7.36565		STN41Zn[3]	41.353	1.38774			STN22 Cd[6] A	0.533241		STN41Cd[4]	5.67663	0.00252495
STN22 Zn[4] B	14.7747		STN41Zn[2]	110.757	2.7122			STN22 Cd[5] B	1.03296		STN41Cd[3]	14.1195	0.449303
STN22 Zn[4] A	16.4318		STN41Zn[1]	133.684	0.613519			STN22 Cd[5] A	1.03254		STN41Cd[2]	35.3994	0.142868
STN22 Zn[3] B	59.2685		STN46Zn[9]	0.438665	0.425817			STN22 Cd[4] B	1.52628		STN41Cd[1]	25.8287	0.187336
STN22 Zn[3] A	57.0216		STN46Zn[8]	2.66907	0.357321			STN22 Cd[4] A	1.57178		STN46Cd[6]	0.417116	0.033793
STN22 Zn[2] B	147.328		STN46Zn[7]	4.19524	0.141269			STN22 Cd[3] B	9.73577		STN46Cd[5]	2.5582	0.103306
STN22 Zn[2] A	146.208		STN46Zn[6]	41.3368	0.332916			STN22 Cd[3] A	9.68473		STN46Cd[4]	14.4409	0.324315
STN22 Zn[1] B	418.854		STN46Zn[5]	14.3383	0.572449			STN22 Cd[2] B	35.0417		STN46Cd[3]	26.2516	0.0782665
STN22 Zn[1] A	411.664		STN46Zn[4]	51.6587	0.321614			STN22 Cd[2] A	35.6815		STN46Cd[2]	36.9915	0.03213
STN29 Zn[6] B	14.5048		STN46Zn[3]	97.8387	0.961181			STN22 Cd[1] B	53.2084		STN46Cd[1]	43.82	0.0344621
STN29 Zn[6] A	16.5062		STN46Zn[2]	134.066	0.74958			STN22 Cd[1] A	53.3029		STN52Cd[6]	0.946656	0.0409495
STN29 Zn[5] B	33.7682		STN46Zn[1]	173.354	3.06842			STN29 Cd[6] B	1.2351		STN52Cd[5]	0.0418718	0.0121054
STN29 Zn[5] A	34.0041		STN52Zn[6]	42.5084	1.31106			STN29 Cd[6] A	1.3196		STN52Cd[4]	0.770635	0.0254278
STN29 Zn[4] B	11.9737		STN52Zn[5]	13.279	0.454529			STN29 Cd[5] B	2.56103		STN52Cd[3]	1.78999	0.0052905
STN29 Zn[4] A	11.8732		STN52Zn[4]	5.46466	0.460299			STN29 Cd[5] A	2.56479		STN52Cd[2]	15.289	0.125222
STN29 Zn[3] B	20.9612		STN52Zn[3]	5.71348	0.30369			STN29 Cd[4] B	1.4821		STN52Cd[1]	41.6848	0.28548
STN29 Zn[3] A	22		STN52Zn[2]	48.1592	1.00919			STN29 Cd[4] A	1.52395		STN57Cd[7]	0.328279	0.00309938
STN29 Zn[2] B	45.3447		STN52Zn[1]	147.177	3.51774			STN29 Cd[3] B	3.47649		STN57Cd[6]	13.6614	0.44222
STN29 Zn[2] A	47.2125		STN57Zn[7]	4.98502	0.0908928			STN29 Cd[3] A	3.52576		STN57Cd[5]	1.37216	0.0447263
STN29 Zn[1] B	82.8316		STN57Zn[6]	11.5332	0.275889			STN29 Cd[2] B	34.257		STN57Cd[4]	4.07341	0.155146
STN29 Zn[1] A	85.4716		STN57Zn[5]	4.51136	0.644889			STN29 Cd[2] A	34.8693		STN57Cd[3]	19.655	0.312104
STN32 Zn[8] B	24.2934		STN57Zn[4]	16.2812	0.375309			STN29 Cd[1] B	31.0399		STN57Cd[2]	38.6672	0.362789
STN32 Zn[8] A	25.0445		STN57Zn[3]	44.8081	0.765152			STN29 Cd[1] A	31.3656		STN57Cd[1]	36.1221	0.0869261
STN32 Zn[7] B	28.8822		STN57Zn[2]	91.5637	2.57857			STN32 Cd[8] B	0.583185		STN62Cd[9]	0.117899	0.0121894
STN32 Zn[7] A	29.3089		STN57Zn[1]	103.88	0.131478			STN32 Cd[8] A	0.551007		STN62Cd[8]	0.234672	0.0303677
STN32 Zn[6] B	25.691		STN62Zn[9]	3.1287	0.269493			STN32 Cd[7] B	0.736591		STN62Cd[7]	0.283743	0.015787
STN32 Zn[6] A	23.2318		STN62Zn[6]	5.20158	0.525611			STN32 Cd[7] A	0.650244		STN62Cd[6]	0.245675	0.0434578
STN32 Zn[5] B	39.1579		STN62Zn[5]	2.64361	0.0246532			STN32 Cd[6] B	7.65986		STN62Cd[5]	0.423505	0.0128215
STN32 Zn[5] A	37.1681		STN62Zn[4]	4.04474	0.333543			STN32 Cd[6] A	7.58383		STN62Cd[4]	0.882973	0.076923
STN32 Zn[4] B	53.6138		STN62Zn[3]	33.6536	0.765026			STN32 Cd[5] B	5.14697		STN62Cd[3]	6.92421	0.140897
STN32 Zn[4] A	54.48		STN62Zn[2]	77.8117	2.00534			STN32 Cd[5] A	5.15188		STN62Cd[2]	26.6542	0.348133
STN32 Zn[3] B	63.2003		STN62Zn[1]	71.5989	1.81265			STN32 Cd[4] B	8.32471		STN62Cd[1]	29.2821	0.487911
STN32 Zn[3] A	65.9386		STN67Zn[6]	3.26879	0.474895			STN32 Cd[4] A	8.84333		STN67Cd[6]	0.134456	0.0873096
STN32 Zn[2] B	338.932		STN67Zn[5]	10.0622	1.20195			STN32 Cd[3] B	7.00549		STN67Cd[5]	0.469527	0.0473384
STN32 Zn[2] A	348.44		STN67Zn[3]	18.4174	1.05698			STN32 Cd[3] A	6.96123		STN67Cd[4]	0.42692	0.0389195
STN32 Zn[1] B	446.078		STN67Zn[2]	93.8587	1.18228			STN32 Cd[2] B	123.68		STN67Cd[3]	4.02529	0.00354584
STN32 Zn[1] A	446.227		STN67Zn[1]	160.321	0.0677698			STN32 Cd[2] A	122.833		STN67Cd[2]	35.246	0.383732
STN35 Zn[4] B	87.7986		STN72Zn[7]	8.99893	0.605186			STN32 Cd[1] B	81.3145		STN67Cd[1]	37.2219	0.300417
STN35 Zn[4] A	87.5264		STN72Zn[6]	25.2433	0.398654			STN32 Cd[1] A	82.6857		STN72Cd[7]	0.0311938	0.0682455
STN35 Zn[3] B	173.235		STN72Zn[5]	27.5395	0.474289			STN35 Cd[4] B	3.55488		STN72Cd[6]	14.2425	0.0544934
STN35 Zn[3] A	172.326		STN72Zn[4]	36.6644	0.883088			STN35 Cd[4] A	3.09867		STN72Cd[5]	17.0102	0.299116
STN35 Zn[2] B	190.246		STN72Zn[3]	35.9304	0.154206			STN35 Cd[3] B	21.8778		STN72Cd[4]	26.6629	0.173615
STN35 Zn[2] A	191.638		STN72Zn[2]	116.822	1.72581			STN35 Cd[3] A	22.1623		STN72Cd[3]	27.3497	0.236345
STN35 Zn[1] B	183.641		STN72Zn[1]	40.9819	0.611965			STN35 Cd[2] B	70.6234		STN72Cd[2]	23.0902	0.566566
STN35 Zn[1] A	179.955		STN76Zn[6]	23.7022	0.556365			STN35 Cd[2] A	69.143		STN72Cd[1]	26.2501	0.0344387
STN41 Zn[8] B	17.8564		STN76Zn[5]	50.7996	0.0942772			STN35 Cd[1] B	64.749		STN76Cd[7]	0.72723	0.0241092
STN41 Zn[8] A	17.85		STN76Zn[4]	51.5844	1.95063			STN35 Cd[1] A	65.1506		STN76Cd[6]	3.94447	0.0446103
STN41 Zn[7] B	6.94127		STN76Zn[3]	61.826	0.840037			STN41 Cd[8] B	0.316929		STN76Cd[5]	14.0906	0.564065
STN41 Zn[7] A	6.90738		STN76Zn[2]	62.3737	1.42354			STN41 Cd[8] A	0.317372		STN76Cd[4]	21.8025	0.63703
STN41 Zn[6] B	15.3227		STN79Zn[7]	10.1411	0.345773			STN41 Cd[7] B	0.204617		STN76Cd[3]	25.6885	0.451117
STN41 Zn[6] A	15.2953		STN79Zn[6]	7.57994	0.37429			STN41 Cd[7] A	0.185496		STN76Cd[2]	22.2642	0.51081
STN41 Zn[5] B	18.4965		STN79Zn[5]	27.4489	0.299467			STN41 Cd[6] B	1.02475		STN79Cd[6]	3.38835	0.127989
STN41 Zn[5] A	19.5385		STN79Zn[4]	45.1106	0.763184			STN41 Cd[6] A	1.02392		STN79Cd[5]	14.7367	0.0330423
STN41 Zn[4] B	51.8184		STN79Zn[3]	62.9937	2.26744			STN41 Cd[5] B	0.839588		STN79Cd[4]	17.279	0.0433853
STN41 Zn[4] A	52.8866		STN79Zn[2]	42.1645	0.512201			STN41 Cd[5] A	0.87479		STN79Cd[3]	22.7913	0.35401
STN41 Zn[3] B	40.6592		STN79Zn[1]	61.802	0.54304			STN41 Cd[4] B	5.67789		STN79Cd[2]	22.4203	0.0153933
STN41 Zn[3] A	42.0469							STN41 Cd[4] A	5.67537		STN79Cd[1]	24.9264	0.39244
STN41 Zn[2] B	112.113							STN41 Cd[3] B	13.8948
STN41 Zn[2] A	109.401							STN41 Cd[3] A	14.3441
STN41 Zn[1] B	133.377							STN41 Cd[2] B	35.328
STN41 Zn[1] A	133.991							STN41 Cd[2] A	35.4708
STN46 Zn[9] A	0.651573							STN41 Cd[1] B	25.7351
STN46 Zn[9] A	0.225756							STN41 Cd[1] A	25.9224
STN46 Zn[8] B	2.49041							STN46 Cd[6] B	0.434013
STN46 Zn[8] A	2.84773							STN46 Cd[6] A	0.40022
STN46 Zn[7] B	4.12461							STN46 Cd[5] B	2.50655
STN46 Zn[7] A	4.26588							STN46 Cd[5] A	2.60986
STN46 Zn[6] B	41.1703							STN46 Cd[4] B	14.6031
STN46 Zn[6] A	41.5033							STN46 Cd[4] A	14.2787
STN46 Zn[5] B	14.6245							STN46 Cd[3] B	26.2907
STN46 Zn[5] A	14.0521							STN46 Cd[3] A	26.2124
STN46 Zn[4] B	51.4979							STN46 Cd[2] B	36.9754
STN46 Zn[4] A	51.8195							STN46 Cd[2] A	37.0075
STN46 Zn[3] B	97.3581							STN46 Cd[1] B	43.8028
STN46 Zn[3] A	98.3193							STN46 Cd[1] A	43.8373
STN46 Zn[2] B	134.44							STN52 Cd[6] B	0.926181
STN46 Zn[2] A	133.691							STN52 Cd[6] A	0.967131
STN46 Zn[1] B	174.888							STN52 Cd[5] B	0.0479245
STN46 Zn[1] A	171.819							STN52 Cd[5] A	0.0358191
STN52 Zn[6] B	43.1639							STN52 Cd[4] B	0.783349
STN52 Zn[6] A	41.8529							STN52 Cd[4] A	0.757922
STN52 Zn[5] B	13.0517							STN52 Cd[3] B	1.79264
STN52 Zn[5] A	13.5062							STN52 Cd[3] A	1.78735
STN52 Zn[4] B	5.69481							STN52 Cd[2] B	15.2264
STN52 Zn[4] A	5.23451							STN52 Cd[2] A	15.3516
STN52 Zn[3] B	5.56164							STN52 Cd[1] B	41.5421
STN52 Zn[3] A	5.86533							STN52 Cd[1] A	41.8276
STN52 Zn[2] B	47.6546							STN57 Cd[7] B	0.329829
STN52 Zn[2] A	48.6638							STN57 Cd[7] A	0.326729
STN52 Zn[1] B	148.936							STN57 Cd[6] B	13.8825
STN52 Zn[1] A	145.418							STN57 Cd[6] A	13.4403
STN57 Zn[7] B	4.93957							STN57 Cd[5] B	1.34979
STN57 Zn[7] A	5.03047							STN57 Cd[5] A	1.39452
STN57 Zn[6] B	11.3952							STN57 Cd[4] B	3.99583
STN57 Zn[6] A	11.6711							STN57 Cd[4] A	4.15098
STN57 Zn[5] B	4.18891							STN57 Cd[3] B	19.811
STN57 Zn[5] A	4.8338							STN57 Cd[3] A	19.4989
STN57 Zn[4] B	16.0936							STN57 Cd[2] B	38.8486
STN57 Zn[4] A	16.4689							STN57 Cd[2] A	38.4859
STN57 Zn[3] B	45.1907							STN57 Cd[1] B	36.1656
STN57 Zn[3] A	44.4255							STN57 Cd[1] A	36.0786
STN57 Zn[2] B	92.853							STN62 Cd[9] B	0.111805
STN57 Zn[2] A	90.2744							STN62 Cd[9] A	0.123994
STN57 Zn[1] B	103.814							STN62 Cd[8] B	0.249855
STN57 Zn[1] A	103.946							STN62 Cd[8] A	0.219488
STN62 Zn[9] B	3.26344							STN62 Cd[7] B	0.27585
STN62 Zn[9] A	2.99395							STN62 Cd[7] A	0.291637
STN62 Zn[6] B	4.93877							STN62 Cd[6] B	0.223946
STN62 Zn[6] A	5.46438							STN62 Cd[6] A	0.267404
STN62 Zn[5] B	2.63128							STN62 Cd[5] B	0.429916
STN62 Zn[5] A	2.65593							STN62 Cd[5] A	0.417095
STN62 Zn[4] B	4.21151							STN62 Cd[4] B	0.844512
STN62 Zn[4] A	3.87797							STN62 Cd[4] A	0.921435
STN62 Zn[3] B	33.2711							STN62 Cd[3] B	6.85376
STN62 Zn[3] A	34.0361							STN62 Cd[3] A	6.99466
STN62 Zn[2] B	78.8144							STN62 Cd[2] B	26.4802
STN62 Zn[2] A	76.809							STN62 Cd[2] A	26.8283
STN62 Zn[1] B	72.5052							STN62 Cd[1] B	29.0381
STN62 Zn[1] A	70.6926							STN62 Cd[1] A	29.526
STN67 Zn[6] B	3.50624							STN67 Cd[6] B	0.178111
STN67 Zn[6] A	3.03134							STN67 Cd[6] A	0.0908012
STN67 Zn[5] B	10.6632							STN67 Cd[5] B	0.493196
STN67 Zn[5] A	9.46128							STN67 Cd[5] A	0.445858
STN67 Zn[3] B	17.8889							STN67 Cd[4] B	0.44638
STN67 Zn[3] A	18.9459							STN67 Cd[4] A	0.40746
STN67 Zn[2] B	94.4499							STN67 Cd[3] B	4.02352
STN67 Zn[2] A	93.2676							STN67 Cd[3] A	4.02706
STN67 Zn[1] B	160.287							STN67 Cd[2] B	35.4378
STN67 Zn[1] A	160.354							STN67 Cd[2] A	35.0541
STN72 Zn[7] B	9.30152							STN67 Cd[1] B	37.0717
STN72 Zn[7] A	8.69634							STN67 Cd[1] A	37.3721
STN72 Zn[6] B	25.4426							STN72 Cd[7] B	0.0653166
STN72 Zn[6] A	25.044							STN72 Cd[7] A	-0.00292894
STN72 Zn[5] B	27.7766							STN72 Cd[6] B	14.2697
STN72 Zn[5] A	27.3024							STN72 Cd[6] A	14.2152
STN72 Zn[4] B	36.2228							STN72 Cd[5] B	17.1597
STN72 Zn[4] A	37.1059							STN72 Cd[5] A	16.8606
STN72 Zn[3] B	35.8533							STN72 Cd[4] B	26.7497
STN72 Zn[3] A	36.0075							STN72 Cd[4] A	26.5761
STN72 Zn[2] B	117.685							STN72 Cd[3] B	27.2315
STN72 Zn[2] A	115.959							STN72 Cd[3] A	27.4678
STN72 Zn[1] B	40.6759							STN72 Cd[2] B	22.807
STN72 Zn[1] A	41.2879							STN72 Cd[2] A	23.3735
STN76 Zn[6] B	23.9804							STN72 Cd[1] B	26.2673
STN76 Zn[6] A	23.4241							STN72 Cd[1] A	26.2328
STN76 Zn[5] B	50.7525							STN76 Cd[7] B	0.715175
STN76 Zn[5] A	50.8468							STN76 Cd[7] A	0.739284
STN76 Zn[4] B	50.6091							STN76 Cd[6] B	3.92217
STN76 Zn[4] A	52.5597							STN76 Cd[6] A	3.96678
STN76 Zn[3] B	61.406							STN76 Cd[5] B	13.8086
STN76 Zn[3] A	62.246							STN76 Cd[5] A	14.3726
STN76 Zn[2] B	63.0855							STN76 Cd[4] B	21.484
STN76 Zn[2] A	61.662							STN76 Cd[4] A	22.121
STN79 Zn[7] B	10.314							STN76 Cd[3] B	25.463
STN79 Zn[7] A	9.96826							STN76 Cd[3] A	25.9141
STN79 Zn[6] B	7.39279							STN76 Cd[2] B	22.5196
STN79 Zn[6] A	7.76708							STN76 Cd[2] A	22.0088
STN79 Zn[5] B	27.5986							STN79 Cd[6] B	3.32436
STN79 Zn[5] A	27.2991							STN79 Cd[6] A	3.45235
STN79 Zn[4] B	45.4922							STN79 Cd[5] B	14.7532
STN79 Zn[4] A	44.729							STN79 Cd[5] A	14.7202
STN79 Zn[3] B	64.1274							STN79 Cd[4] B	17.2573
STN79 Zn[3] A	61.8599							STN79 Cd[4] A	17.3007
STN79 Zn[2] B	41.9084							STN79 Cd[3] B	22.6143
STN79 Zn[2] A	42.4206							STN79 Cd[3] A	22.9683
STN79 Zn[1] B	62.0735							STN79 Cd[2] B	22.428
STN79 Zn[1] A	61.5305							STN79 Cd[2] A	22.4126
								STN79 Cd[1] B	24.7302
								STN79 Cd[1] A	25.1227
