# Supplementary material for: High metabolic zinc demand within native Amundsen and Ross sea phytoplankton communities determined by stable isotope uptake rate measurements
Source: Copernicus journal article supplement (doi:10.5194/bg-21-5685-2024), 2024-12-19
Supplement: Supplementary file 2 [file bg-21-5685-2024-supplement.zip]

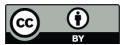

*Supplement of*

**High metabolic zinc demand within native Amundsen and Ross sea phytoplankton communities determined by stable isotope uptake rate measurements**

Riss M. Kell et al.

*Correspondence to:* Mak A. Saito ([msaito@whoi.edu](mailto:msaito@whoi.edu))

- [bg-21-5685-2024-supplement-title-page.pdf](#)
- [Supplementary 10\\_31\\_24.pdf](#)
- [Supplementary File 1 pMetal Dups Summary.xlsx](#)

The copyright of individual parts of the supplement might differ from the article licence.
